# Supplementary material for: Neuromuscular Organoids Recapitulate Defective Autophagy in GNE Myopathy and Highlight Therapeutic Rescue by PI3K Inhibition
Source: Research Square preprint supplement (doi:10.21203/rs.3.rs-7441350/v1), 2025-09-30

**Neuromuscular Organoids Recapitulate Defective Autophagy in GNE Myopathy and Highlight Therapeutic Rescue by PI3K Inhibition**

**Running title:** NMO for drug testing in GNE Myopathy

Dong-Woo Kim, Eun-Ji Kwon, Hyuk Kwon, Jume Kim, and Hyuk-Jin Cha

## **Supplementary Materials and Methods**

### **Bulk RNA-seq library preparation**

Total RNA was isolated from C2C12 cells using Easy-BLUETM RNA isolation kit (iNtRON Biotechnology, #17061). One 1 µg of total RNA was processed for preparing mRNA sequencing library using MGIEasy RNA Directional Library Prep Kit (MGI) according to manufacturer's instruction. The first step entails utilizing poly-T oligo-attached magnetic beads to isolate the mRNA molecules that contain poly-A. Following purification, divalent cations and a high temperature are used to break the mRNA into small pieces. Utilizing reverse transcriptase and random primers, the cleaved RNA fragments are converted into first strand cDNA. After achieving strand specificity in the RT directional buffer, second strand cDNA synthesis takes place. The 'A' base is then added to these cDNA fragments, followed by the ligation of the adapter. The final cDNA library is made by purifying and enriching the results with PCR. The QauntiFluor ONE dsDNA System (Promega) is used to quantify the double stranded library. The library is circularized at 37 °C for 30 min, and then digested at 37 °C for 30 min, followed by cleanup of circularization product. The library is treated with the DNB enzyme at 30 °C for 25 min to create DNA nanoballs (DNB). Finally, Library was quantified by QauntiFluor ssDNA System (Promega). On the MGISEQ system (MGI), the prepared DNB was sequenced using 100 bp paired-end reads.

### **Transfection for establishment of GNE Knock-Out myoblasts**

For transfection, C2C12 myoblasts were rinsed with DPBS and detached using 0.25% trypsin-EDTA. Cells were washed three times with Opti-MEM (31985070, Gibco). The cells were then counted, and  $1 \times 10^6$  cells were resuspended in 100 µL of Opti-MEM. 2 µg of spCas9 plasmid and 3 µg of sgRNA plasmid vectors were added to the cell suspension. The cell and plasmid mixture were transferred to an electroporation cuvette. Electroporation was performed using a Nepa-21 electroporator with a poring pulse of 200 V and a transfer pulse of 2.5 ms. The

transfected cells were seeded into a 6-well plate filled with DMEM culture medium. For single-cell isolation, the cells were diluted to a concentration of 1 cell per  $\mu\text{L}$  in culture medium, and 10  $\mu\text{L}$  of this cell solution was seeded into 100 pi culture dishes. Single clones were isolated and expanded first in 12-well plates and then in 6-well plates. The Gne KO C2C12 myoblast clones were analyzed by Sanger sequencing.

### **Flow cytometry**

Cells were detached with 0.25% trypsin-EDTA for C2C12 followed by three washes with DPBS and then analyzed using FACS Calibur, Celesta, and Fortessa (BD Biosciences). For the determination of sialic acid, cells were stained with 1:400 fluorescein-labeled SNA (FL-1301, Vector Laboratories) and 1:330 biotinylated MALII (B-1265, Vector Laboratories). For detection of glycosphingolipids, cells were stained with 1:1000 BODIPY 493/503 (2  $\mu\text{M}$ , Invitrogen). CellQuest Pro software and FlowJo software were used for FACS analysis.

### **Immunocytochemistry**

Cells were treated with cold methanol or 4% PFA/0.5% Triton X-100 for fixation and permeabilization. 3% BSA in PBS was used for blocking solution. For lectin staining, fluorescein-labeled SNA (FL-1301, Vector Laboratories) was diluted in blocking solution and applied to cells for 1 h at room temperature in the dark. In the case of MALII staining, cells were washed three times and then incubated with 1:200 Alexa Fluor 594 streptavidin (#405240, BioLegend) for 30 min at room temperature in the dark. Cells were washed four times before nuclei were stained with DAPI (Thermo Fisher) and mounted on slide glass using MOWIOL solution. Confocal Scope TCS SP8 (Leica) was used for imaging samples.

### **Immunoblotting analysis**

Cells were detached with 0.25% trypsin -EDTA or cell scraper (#3008, Corning) followed by three times DPBS wash on ice. RIPA buffer (Biosesang) containing 1  $\mu\text{M}$  protease inhibitor and 10  $\mu\text{M}$  sodium orthovanadate was used to extract the whole cell lysate, which was then

collected after incubating on ice for 1 hour followed by centrifugation. Protein concentration was measured using the Pierce BCA protein assay Kit (#23225, Thermo Fisher Scientific). Protein lysates were diluted with 5× SDS-PAGE loading buffer (SF2088-110-00, Biosesang) and RIPA buffer. Then, protein samples were boiled at 100 °C for 10 minutes. 10-20 µg of prepared protein sample was loaded and separated on a 7.5-10% SDS-PAGE gel. The separated proteins were transferred to an activated PVDF membrane. 5% skim milk in TBS-T was used for the blocking solution. The transferred membranes were blocked with blocking solution at RT for 1 hour followed by three times TBS-T wash then incubated with primary antibody (1:200-1:1000) in TBS-T at 4 °C overnight. Then, the membranes were washed three times with TBS-T and incubated with secondary antibody (1:10000) in TBS-T at room temperature for 1 hour. Chemiluminescence was detected using Miracle-Star (#16028, iNtRON Biotechnology) or Amersham ECL Prime (#GERPON2232, Cytiva).

### **RT-PCR analysis**

Easy-BLUE™ RNA isolation kit (iNtRON Biotechnology) was used for total RNA extraction. For reverse transcription, 5× PrimeScript™ RT mix (TaKaRa) was used to generate cDNA. Quantitative real-time PCR was performed with SYBR Green PCR reagents (Life Technologies) using the QuantStudio3 (Applied Biosystems).

### **Cell growth analysis**

Cell growth was monitored using the JuLI™ Stage (NanoEntek), an automated real-time live-cell imaging system. Cells were seeded in 6-well plate and cultured in DMEM supplemented with 10% FBS and 50 µg/ml Gentamicin in 5% CO<sub>2</sub> at 37°C. In the case of glucose deprivation, cells were washed three times with DPBS and changed to DMEM, no glucose (#11966025, Gibco) with 10% FBS and 50 µg/ml gentamicin. The JuLI™ Stage was placed inside the incubator, and time-lapse imaging was performed at 1-4 hour intervals in bright field mode.



### **Collagen quantification assay**

Total soluble collagen content was measured using the Sircol™ Soluble Collagen Assay Kit (Biocolor, UK) according to the manufacturer's instructions. Cell culture supernatants were collected 3-4 days after seeding. The Multi Mixer (SLRM-3, SeouLin Bioscience) was used for inverting steps during the collagen assay. Collagen concentrations were measured using the Epoch Microplate Spectrophotometer (Biotek).

## Supplementary Figure Legends

**Figure S1** (A) Summary of GEO datasets used for cross-validation, including sample types, sizes, and relevant PMIDs. (B) Gene ontology terms enriched in Normal group, highlighting muscle development and smooth muscle contraction pathways. (C-D) Enrichment of gene sets related to autophagosome formation and vesicle nucleation in Normal versus GNE I329T sample.

**Figure S2** (A) Graphical description of the gRNA genomic locus, along with the DNA and amino acid sequences of both WT and KO cells. The T-A base insertion is shown in red. Altered amino acid sequences are indicated in blue. (B) Schematic of T7 endonuclease I (T7E1) digestion assay showing genome editing in WT and KO cells under mock and T7E1 conditions. Gel electrophoresis of PCR-amplified genomic DNA from WT and KO cells, confirming indel formation.

**Figure S3** Representative images of mCherry-GFP-LC3 fluorescence in WT and KO cells following 2-hour EBSS and Bafilomycin A1 treatment. Yellow puncta indicate autophagosomes, and red-only puncta represent autolysosomes.

**Figure S4.** (A) Two-dimensional uniform manifold approximation and projection (UMAP) visualization of scRNA-seq data from GNE myopathy patient and healthy controls. Each point represents a cell, with colors based on subtype annotations defined by the Louvain clustering algorithm and marker genes. (B) Proportion of data types shown in (A) across different clusters. (C-D) Enriched MSigDB WIKIPATHWAYS gene sets for upregulated genes in each cluster.

**Figure S5.** (A) PCA analysis of Myoblasts samples including WT, V727M, R160Q, I588T, I329T, and C2C12 WT and KO samples. (B) Heatmap showing unsupervised hierarchical clustering of pairwise Pearson correlations between the RNA-seq datasets used in (A). (C)

Enriched Gene Ontology Molecular Function gene sets for upregulated genes in I329T cells compared to Normal cells (left) and KO cells compared to WT cells (right). **(D)** Enriched Gene Ontology Biological Process gene sets for upregulated genes in I329T cells compared to Normal cells (left) and KO cells compared to WT cells (right). **(E)** Enriched Gene Ontology Cellular Component gene sets for upregulated genes in I329T cells compared to Normal cells (left) and KO cells compared to WT cells (right).

**Figure S6** (A) Volcano plot of differential gene expression between normal and mutant samples used for CMap query generation. Genes were filtered to 964 landmark genes and input into the CMap pipeline. (B) Schematic overview of the similarity scoring methodology in CMap, showing both Pearson correlation and cosine similarity equations used to compare gene signatures. (C) Bar plot (left) of the top 10 negatively correlated compounds in the A549 cell line, ranked by enrichment coefficient. PI3K/mTOR inhibitors are highlighted in red. Pie chart (right) summarizes the mechanisms of action (MOA) for these top hits, with 50% classified as PI3K/mTOR inhibitors. (D) Bar plot (left) of the top 10 negatively correlated compounds in the PC3 cell line, with 60% of the compounds classified as PI3K/mTOR inhibitors (pie chart, right). (E) List of PI3K/mTOR-targeting compounds with drug targets, IC<sub>50</sub> values, and clinical application statuses.

**Figure S7** (A) Immunofluorescence images of neuromuscular organoids (NMOs) derived from normal and I329T hPSCs, stained with DAPI (gray), MyHC (magenta), and TUJ1 (green). Scale bars, 200  $\mu$ m. (B) High-magnification images showing reduced MyHC/TUJ1 signal intensity and structural organization in I329T NMOs compared to controls. Scale bars, 100  $\mu$ m. (C) Principal component analysis (PCA) plot illustrating transcriptomic separation between normal and I329T NMOs. (D) Heatmaps showing gene expression of vesicle nucleation and autophagosome formation-related genes in Normal and I329T NMOs. (E) Bar graph of

enriched MSigDB hallmark gene sets in I329T NMOs versus controls, highlighting upregulation of MTORC1\_SIGNALING. (F) GSEA plot showing significant enrichment of the “MTORC1\_SIGNALING” gene set in I329T NMOs (NES = 1.51, FDR < 0.001).

Figure S1

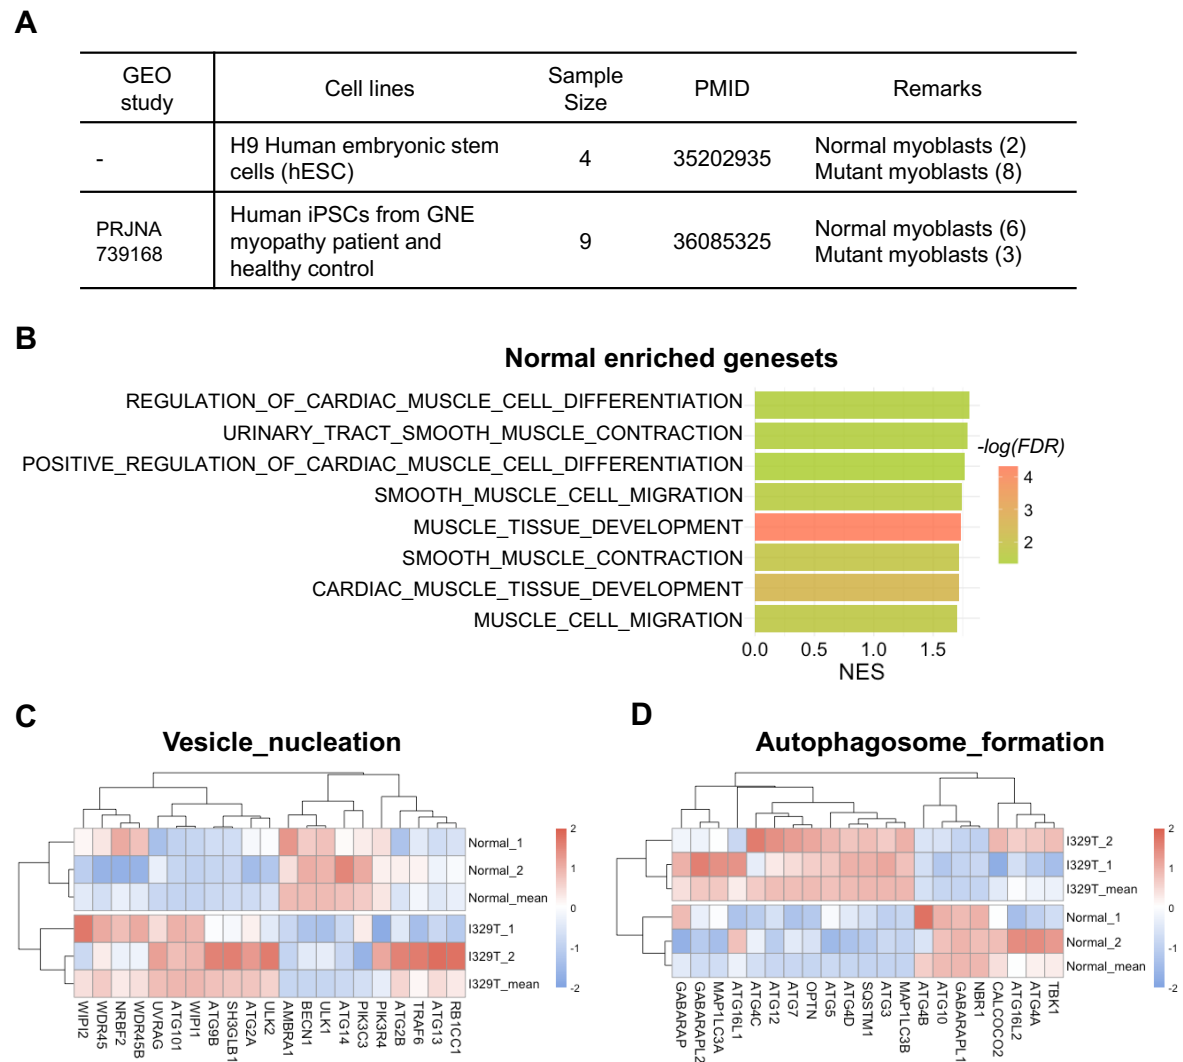

Figure S2

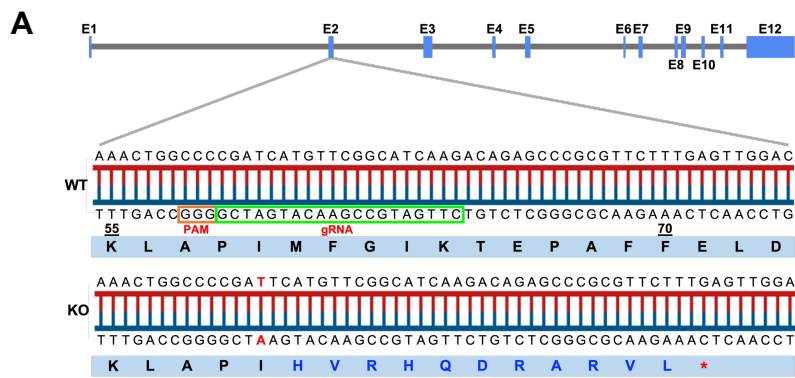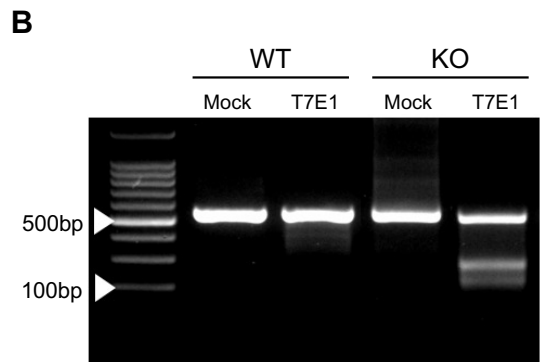

**Figure S3**

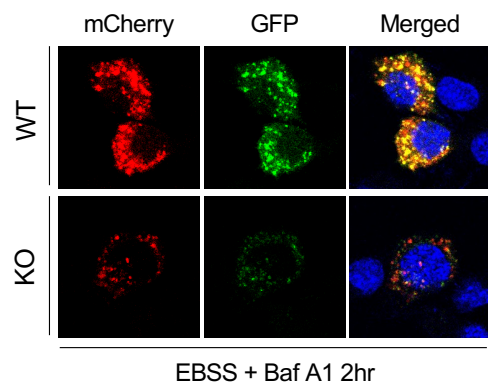

Figure S4

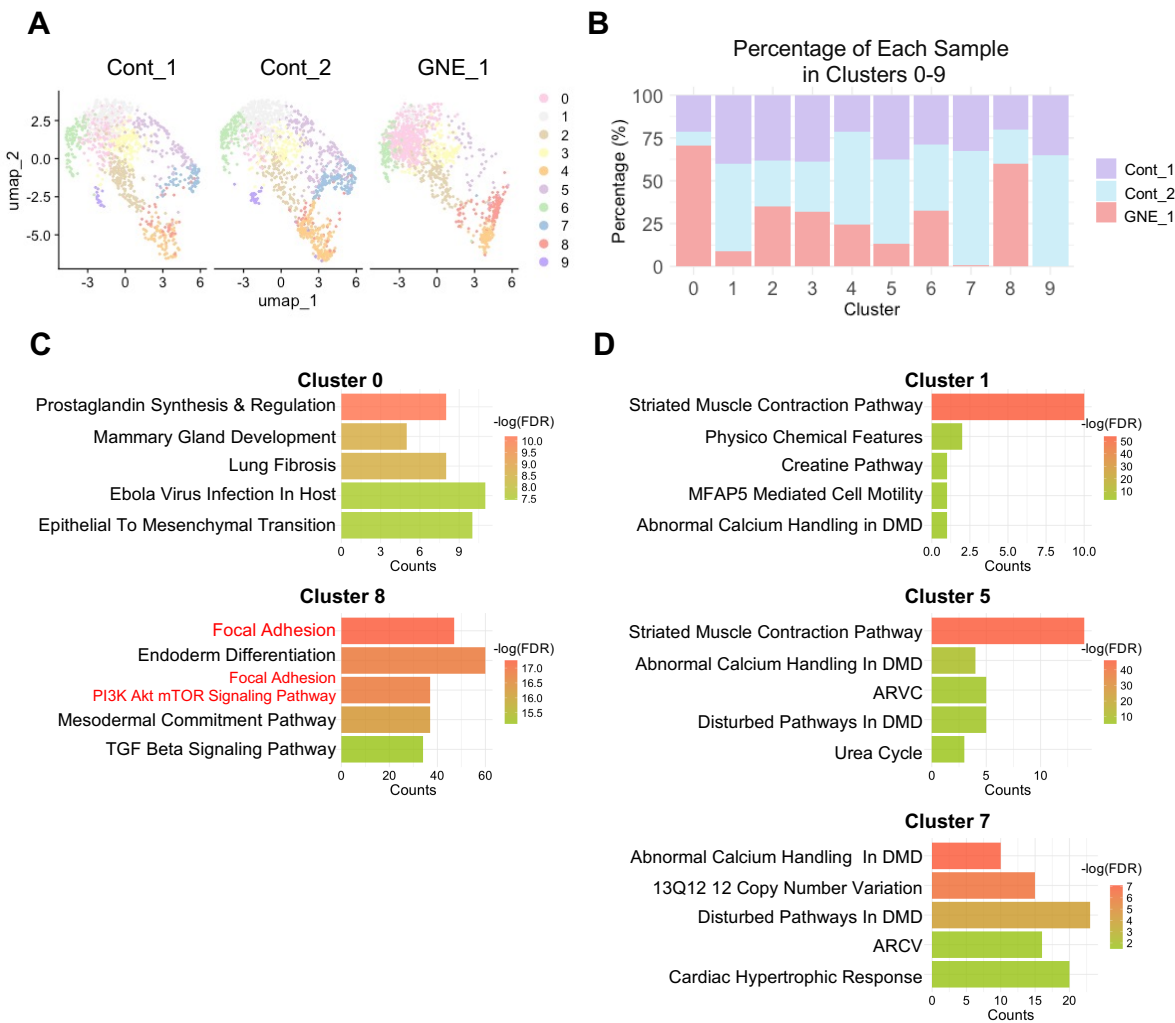



Figure S5

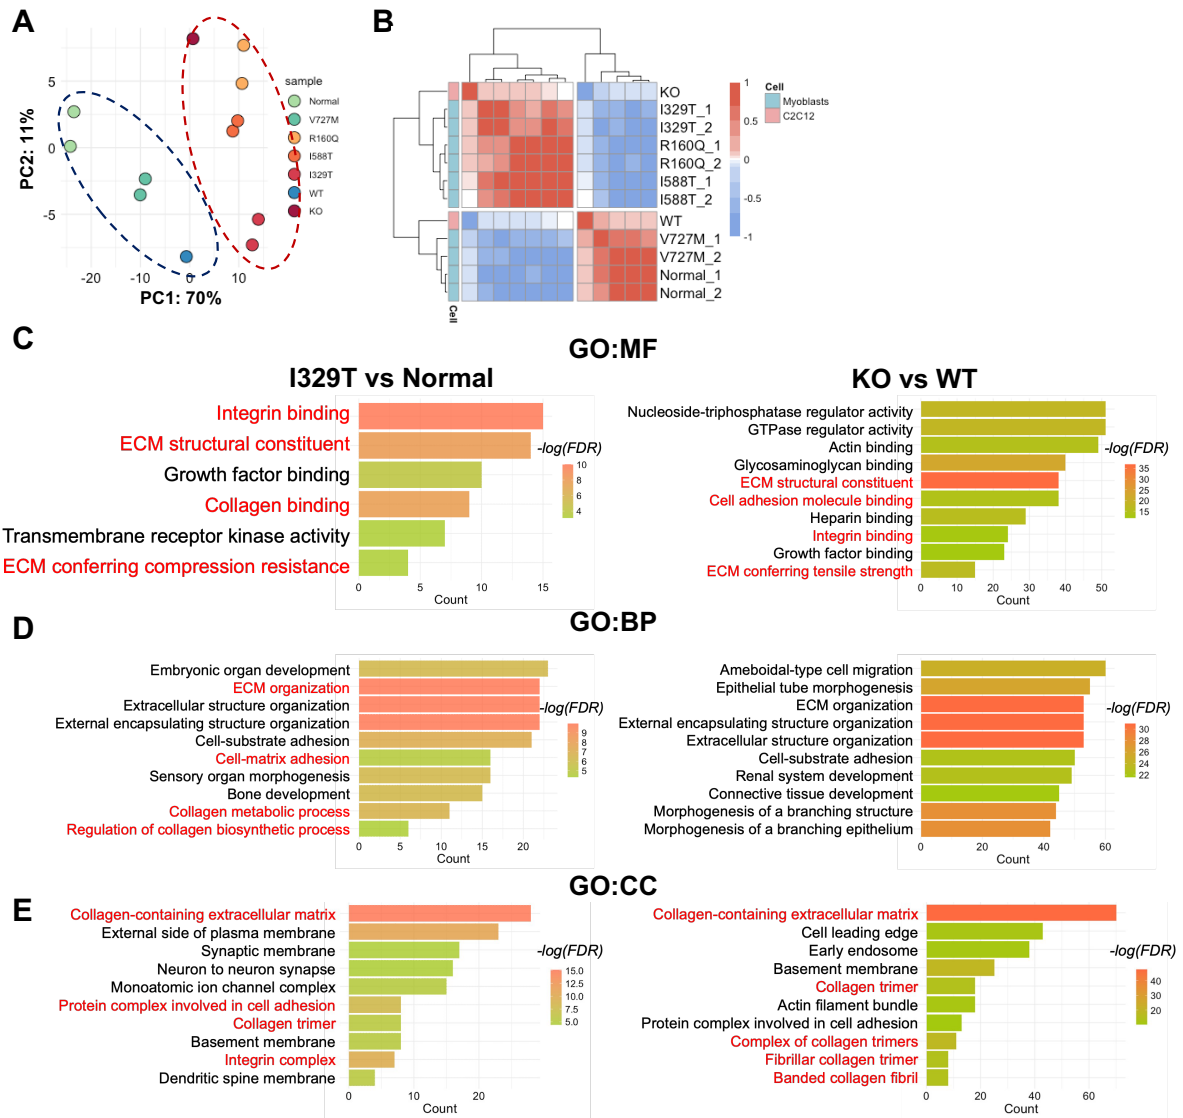

**Figure S6**

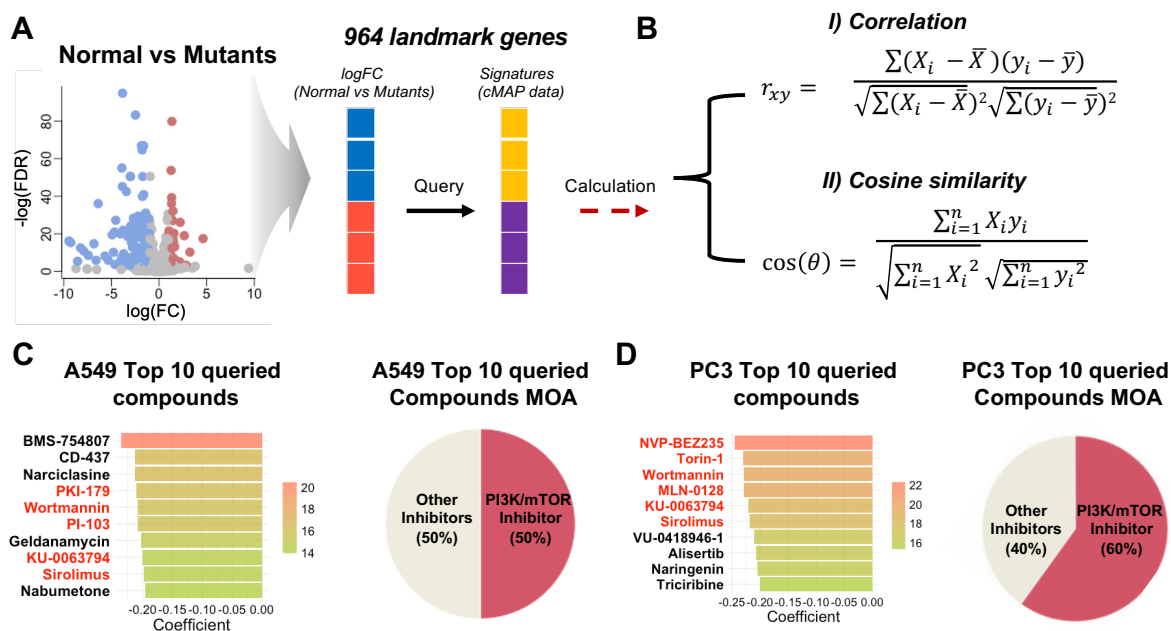

**E**

|              |         | Compound   | Drug         | Target                            | IC50                  | Application       |
|--------------|---------|------------|--------------|-----------------------------------|-----------------------|-------------------|
| FDA-approved |         | BAY80-6946 | Copanlisib   | <b>PI3K</b>                       | 0.5nM                 | Leukemia          |
|              |         | Sirolimus  | Rapamycin    | <b>mTOR</b>                       | 0.1nM                 | Immunosuppressant |
| Clinical     | Ph. 1   | MLN-0128   | Sapanisertib | <b>mTOR</b>                       | 1nM                   |                   |
|              | Ph. 2   | GDC-0980   | Apitolisib   | <b>PI3K</b><br><b>mTOR</b>        | 5nM<br>17nM           |                   |
|              | Ph. 1/2 | SAR245409  | Voxtalisib   | <b>mTOR/PI3K</b>                  | 9nM                   |                   |
|              | Ph. 1/2 | AZD2014    | Vistusertib  | <b>mTOR1/2</b><br><b>PI3K</b>     | 2.5nM<br>3.8μM        |                   |
|              | Ph. 1   | GSK2126458 | Omipalisib   | <b>PI3K</b><br><b>mTOR1/2</b>     | 0.019nM<br>0.18/0.3nM |                   |
|              | Ph. 2   | NVP-BEZ235 | Dactolisib   | <b>PI3K</b><br><b>mTOR</b>        | 4nM<br>6nM            | Autophagy, HIV    |
| Pre-clinical |         | Torin1     |              | <b>mTOR1/2</b>                    | 2/10nM                |                   |
|              |         | Wortmannin |              | <b>PI3K</b><br><b>DNA-PK/ATM</b>  | 3nM<br>16/150nM       |                   |
|              |         | KU-0063794 |              | <b>mTOR1/2</b>                    | 10nM                  |                   |
|              |         | AS-0605240 |              | <b>PI3K</b>                       | 8nM                   |                   |
|              |         | PKI-179    |              | <b>PI3K</b><br><b>mTOR</b>        | 8nM<br>0.42nM         | Anti-tumor        |
|              |         | PI-103     |              | <b>PI3K</b><br><b>mTOR/DNA-PK</b> | 2nM<br>30/23nM        | Apoptosis         |

Figure S7

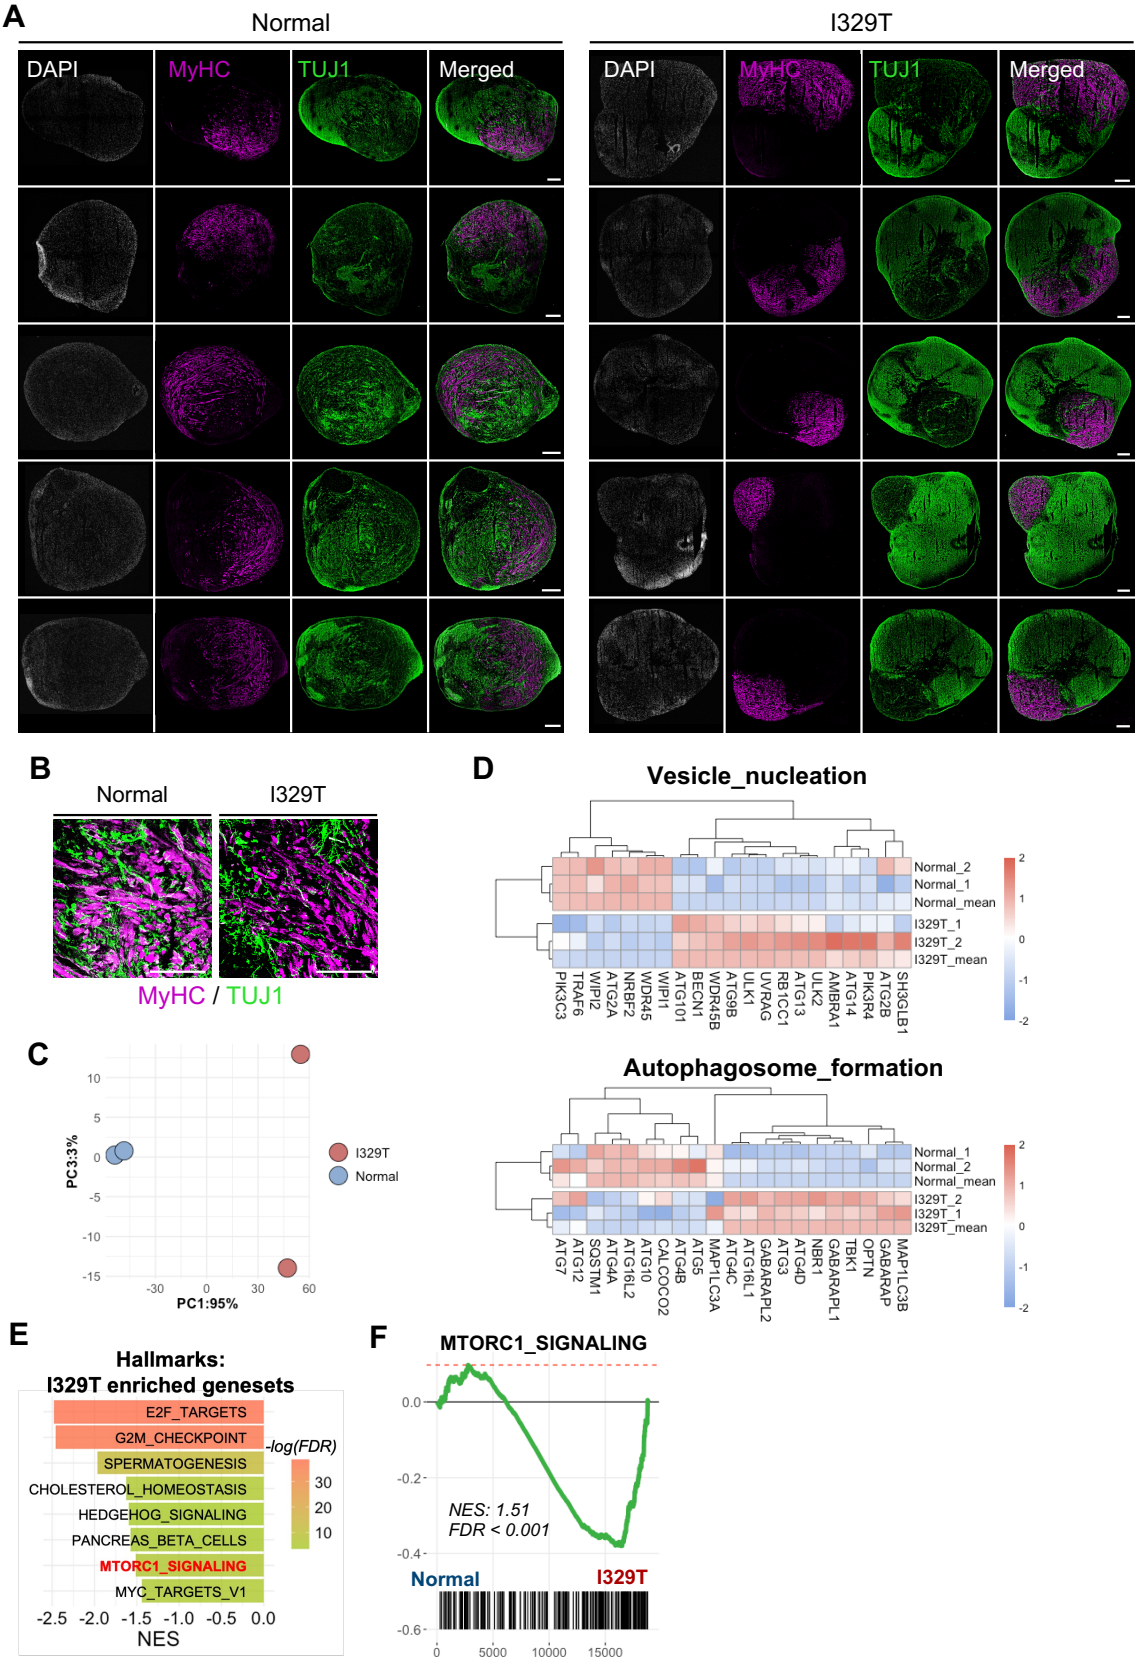

Supplement: Supplementary file 1 [file 7f987bfe224441a8d13cf8fc.pdf]
